# Supplementary material for: Mycobacterium florentinum pulmonary disease: a case report and review of the literature
Source: BMC Infect Dis. 2025 Dec 17;26:103. doi: 10.1186/s12879-025-12321-3 (PMC12822083; doi:10.1186/s12879-025-12321-3)
Supplement: Supplementary file 2 — Supplementary Material 2 [file 12879_2025_12321_MOESM2_ESM.xlsx]

## Sheet: Tabelle1
Antimicrobial Agent	M. florentinum isolate Dec 2018 MIC Values(mg/l)	M. florentinum isolate Dec 2020 MIC Values(mg/l)	M. florentinum isolate Oct 2021 MIC Values(mg/l)	Susceptibility Categories (S/R)
Clarithromycin	1.0	1.0	1.0	S
Rifampicin	>8.0	>8.0	>8.0	R
Rifabutin	≤0,25	≤0,25	≤0,25	S
Amikacin IV	16.0	8.0	16.0	S
Doxycyclin	>16.0	>16.0	>16.0	R
Moxifloxacin	>8.0	>8.0	>8.0	R
Ciprofloxacin	>16.0	>16.0	>16.0	R
Linezolid	4.0	4.0	4.0	S
Trimethoprim-Sulfamethoxazole	19.0	19.0	19.0	S
Antimicrobial Agent	M. avium isolate Dec 2020 MIC Values(mg/l)	Susceptibility Categories (S/I/R)
Clarithromycin	8.0	S
Amikacin IV	8.0	S
Amikacin inh.	8.0	S
Moxifloxacin	4.0	R
Linezolid	>64	R
Antimicrobial susceptibility testing (AST) was performed and assesed by broth microdilution method (SensititreTM Myco susceptibility plates SLOMYCOI, Thermo Fisher Diagnostics GmbH, Germany) according to Clinical and laboratory standards institute (CLSI M24Ed2 and M62Ed1 (November 2018 and CLSI M24S Ed2 (February 2023) guideline
Source: CLSI. Susceptibility Testing of Mycobacteria, Nocardia ssp., and Other Aerobic Actinomycetes. 3rd ed. CLSI standard M24. Wayne, PA: Clinical and Laboratory Standards Institute; 2018. In.; CLSI. Performance Standards for Susceptibility Testing of Mycobacteria, Nocardia ssp., and Other Aerobic Actinomycetes. 1st ed. CLSI standard M62 Wayne, PA: Clinical and Laboratory Standards Institute; 2…
